# Supplementary material for: Three-dimensional nano-folded transition-metal oxide electrode materials for high-performing electrochemical energy-storage devices
Source: Royal Society of Chemistry journal article supplement (doi:10.1039/d1tc05889d), 2022-01-01
Supplement: d1tc05889d1.pdf [file d1tc05889d1.pdf]

**Supporting information for**

**Three-Dimensional Nano-folded Transition-Metal Oxide Electrode Materials for High-Performing Electrochemical Energy Storage Devices**

Wanjun Chen,<sup>1,\*</sup> Xingpeng Li<sup>1</sup>, Wenjing Feng<sup>1</sup>, Wei Zhou<sup>1</sup>, Zengteng Liang<sup>1</sup>, Yongheng Zhang<sup>1</sup>, Duojie Gengzang<sup>1</sup>, Guoheng Zhang<sup>1</sup>, Qiong Chen<sup>1</sup>, Peiyu Wang<sup>1</sup>, Haiyan Jiao<sup>1</sup>, Xiaoyan Deng<sup>1</sup>, Shengguo Zhang<sup>2</sup>

<sup>1</sup>Key Laboratory for Electronic Materials, College of Electrical Engineering, Northwest Minzu University, Lanzhou, 730030, P. R. China.

<sup>2</sup>College of Electrical Engineering, Northwest Minzu University, Lanzhou, 730030, P. R. China.

\* Corresponding author: [wjchen@xbmu.edu.cn](mailto:wjchen@xbmu.edu.cn) (Wanjun Chen)

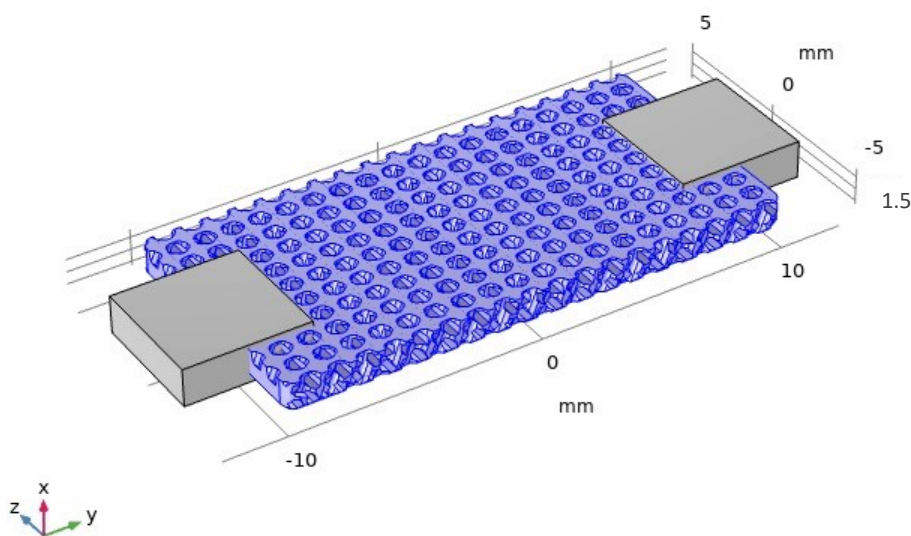

**Figure S1.** The model and geometry parameters for the dynamic thermal oxidation.

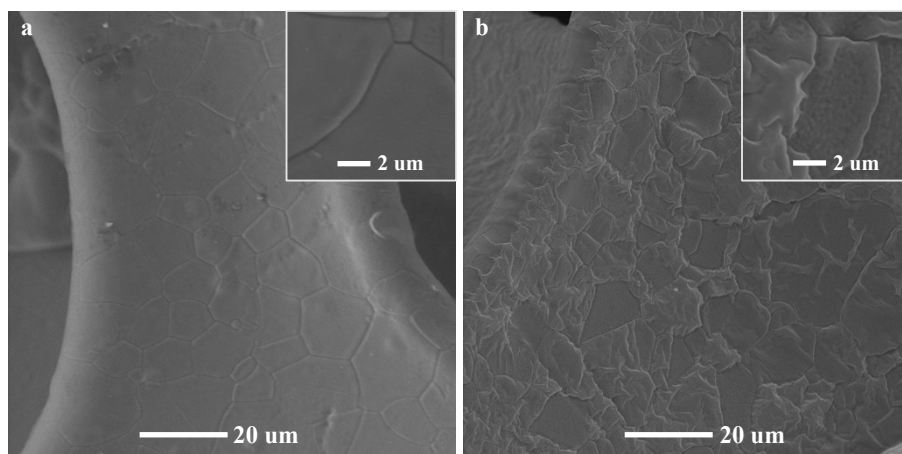

**Figure S2.** The morphological evolutions of the Ni foam before and after dynamic thermal oxidation. (a) representative SEM images of Ni foam after metallographic corrosion; (b) the view of Ni foam after dynamic thermal oxidation.

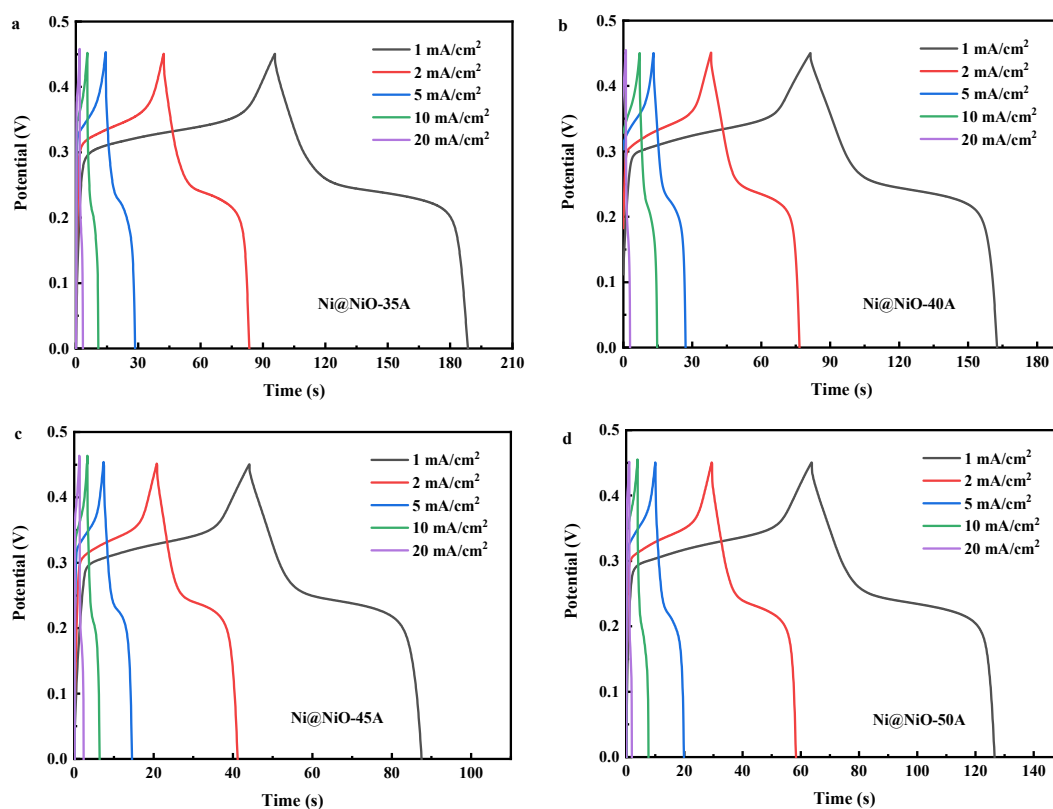

**Figure S3.** GCD curves of 3D nano-folded Ni@NiO freestanding electrode obtained at different dynamic thermal oxidation stages: (a) Ni@NiO-35A; (b) Ni@NiO-40A; (c) Ni@NiO-45A; (d) Ni@NiO-50A).

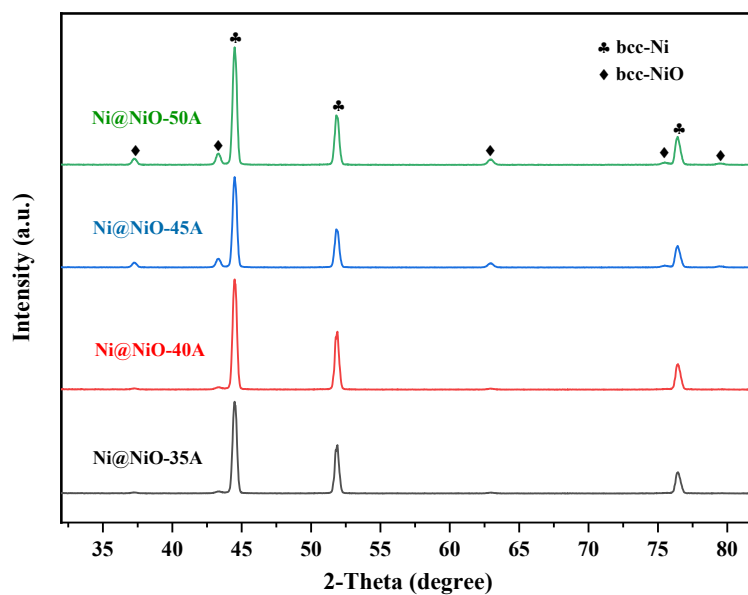

**Figure S4.** XRD pattern of the 3D nano-folded Ni@NiO obtained at different conditions.

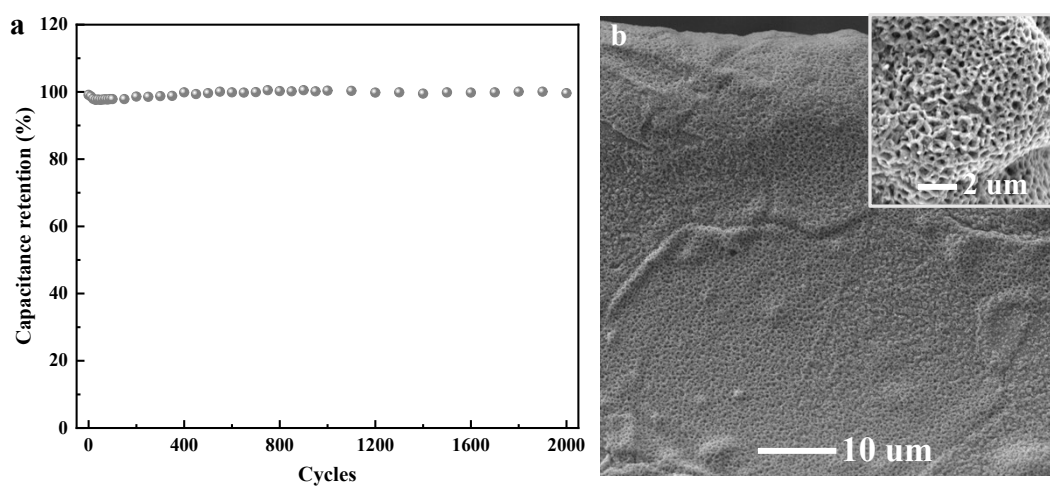

**Figure S5.** The cycling performance and morphological evolution of the Ni@NiO-40A electrode. (a) Capacitance retention with the cycling operations; (b) representative SEM view of the Ni@NiO-40A electrode after 2000 cycles.

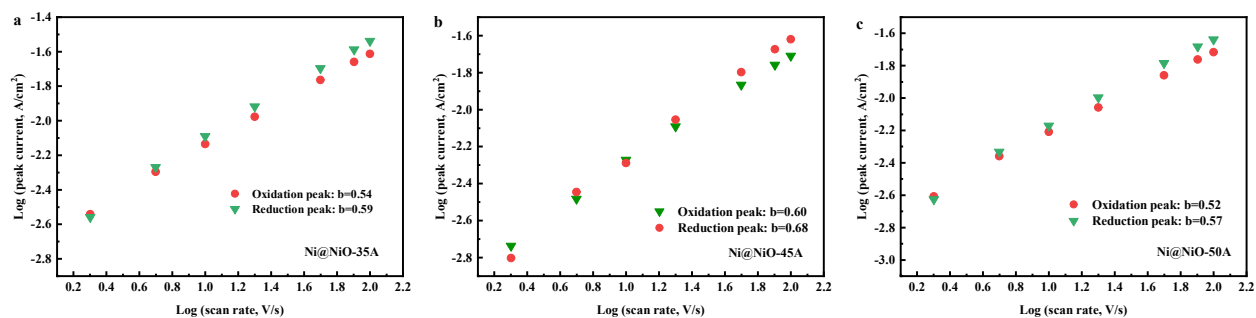

**Figure S6.** The oxidation and reduction peak derived  $b$ -value at different scan rates of the 3D nano-folded Ni@NiO freestanding electrode obtained at different dynamic thermal oxidation stages.

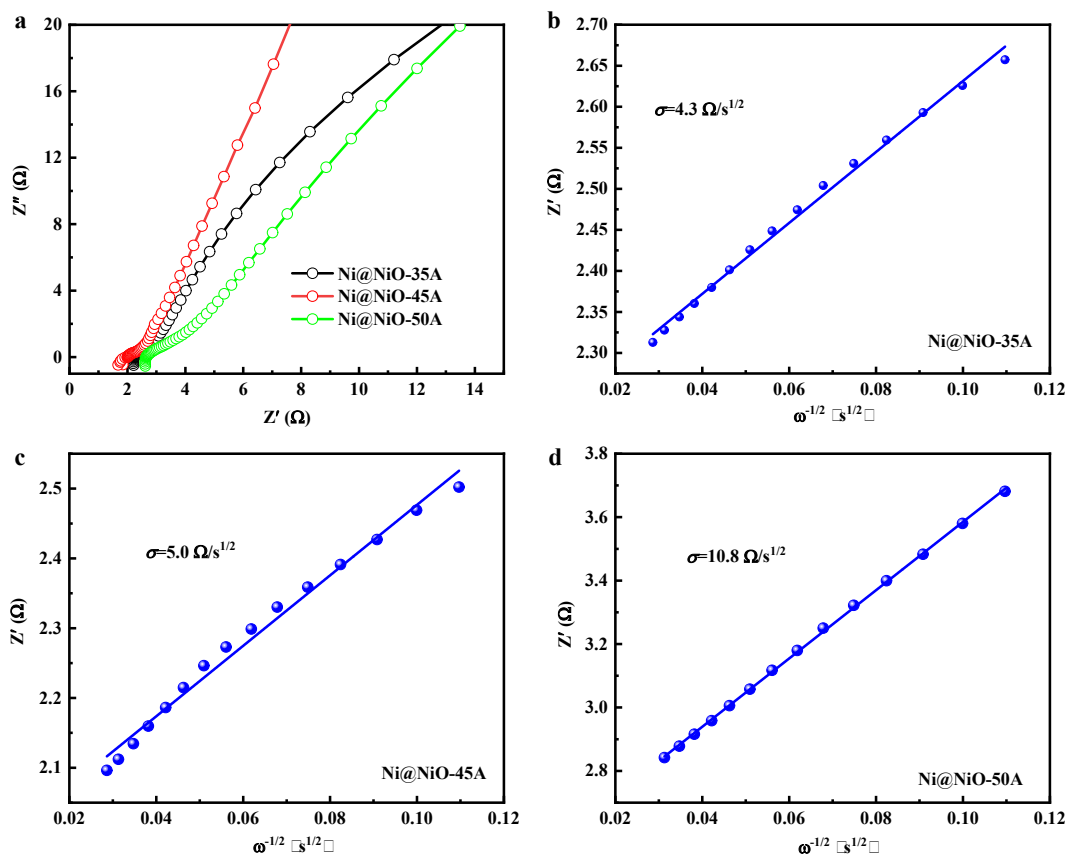

**Figure S7.** Electrochemical kinetics of the 3D nano-folded Ni@NiO freestanding electrode obtained at different dynamic thermal oxidation stages. (a) EIS spectrum of the different samples; (b-c) The relationship between  $Z'$  and the reciprocal of the square root of frequency ( $\omega^{-1/2}$ ) in the intermediate frequency range.

**Table S1.** NiO coverage and stoichiometric analysis in the 3D nano-folded Ni@NiO obtained at different condition.

| Samples    | Spot 1 | Spot 2 | Spot 3 | Spot 4 | Spot 5 | Spot 6 | Average |
|------------|--------|--------|--------|--------|--------|--------|---------|
| Ni@NiO-35A | 1.15   | 1.02   | 0.98   | 1.09   | 1.03   | 1.21   | 1.08    |
| Ni@NiO-40A | 1.04   | 0.96   | 1.01   | 1.05   | 0.98   | 1.03   | 1.01    |
| Ni@NiO-45A | 0.94   | 0.92   | 1.06   | 0.97   | 0.89   | 1.01   | 0.97    |
| Ni@NiO-50A | 0.98   | 0.86   | 0.92   | 1.03   | 0.96   | 0.94   | 0.95    |

**Table S2.** Electrochemical performance of recent reported NiO-based electrode materials.

| Electrodes             | Capacitance                                    | Rate performance             | Ref.     |
|------------------------|------------------------------------------------|------------------------------|----------|
| 3D nano-folded Ni@NiO  | 0.23 F/cm <sup>2</sup> at 2 mV/s<br>(~295 F/g) | 50% (from 2 mV/s to 50 mV/s) | Our work |
| NiO-carbon cloth       | 132 F/g at 5 mV/s                              | 32% (from 5 mV/s to 50 mV/s) | [1]      |
| NiO Fine Nanoparticles | 243 F/g at 2 mV/s                              | 33% (from 2 mV/s to 50 mV/s) | [2]      |
| NiO Nanoflakes         | 263 F/g at 5 mV/s                              | 48% (from 2 mV/s to 50 mV/s) | [3]      |

The mass loading of the electrochemical active NiO in the 3D nano-folded Ni@NiO can be calculated by weighting the mass changes of Ni nanofoams before and after oxidation, which was operated by a microbalance (Mettler, XS105DU) with an accuracy of 0.01 mg. Due to the oxidation formula  $2\text{Ni} + \text{O}_2 \rightarrow 2\text{NiO}$ , the weights of NiO ( $m_{\text{NiO}}$ ) in the final product 3D nano-folded Ni@NiO can be derived from  $m_{\text{NiO}} = \Delta m * 74.69/16$  ( $\Delta m$  denotes the weight difference

of Ni nanofoams before and after oxidation). Accordingly, the mass loading of electrochemical active NiO in the 3D nano-folded Ni@NiO obtained at different condition was calculated as listed in the Table S1.

**Table S3.** NiO contents in the 3D nano-folded Ni@NiO obtained at different condition.

|                        | Ni@NiO-35A | Ni@NiO-40A | Ni@NiO-45A | Ni@NiO-50A |
|------------------------|------------|------------|------------|------------|
| $m_{\text{NiO}}$ (mg)  | 0.47       | 0.78       | 0.97       | 1.35       |
| NiO Content percentage | 7.8%       | 13%        | 16.2%      | 22.5%      |

## Reference

- 1 S. D. Dhas, P. S. Maldar, M. D. Patil, A. B. Nagare, M. R. Waikar, R. G. Sonkawade and A. V. Moholkar, *Vacuum*, 2020, **181**, 109646.
- 2 M. P. Yeager, D. Su, N. S. Marinković and X. Teng, *J. Electrochem. Soc.*, 2012, **159**, A1598-A1603.
- 3 S. Vijayakumar, S. Nagamuthu and G. Muralidharan, *ACS Appl. Mater. Interfaces*, 2013, **5**, 2188-2196.
